# Supplementary material for: Towards New Robust Zn(II) Complexes for the Ring‐Opening Polymerization of Lactide Under Industrially Relevant Conditions
Source: PubMed Central journal article supplement — ChemistryOpen. 2019 Jul 29;8(7):1020–6. doi: 10.1002/open.201900199 (PMC6664153; doi:10.1002/open.201900199), 2019-07-29
Supplement: OPEN-8-1020-s001.pdf [file OPEN-8-1020-s001.pdf]

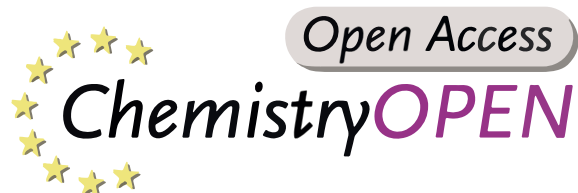

## Supporting Information

© Copyright Wiley-VCH Verlag GmbH & Co. KGaA, 69451 Weinheim, 2019

### **Towards New Robust Zn(II) Complexes for the Ring-Opening Polymerization of Lactide Under Industrially Relevant Conditions**

Pascal M. Schäfer, Katja Dankhoff, Matthias Rothemund, Agnieszka N. Ksiazkiewicz, Andrij Pich, Rainer Schobert, Birgit Weber,\* and Sonja Herres-Pawlis\*© 2019 The Authors. Published by Wiley-VCH Verlag GmbH & Co. KGaA. This is an open access article under the terms of the Creative Commons Attribution Non-Commercial NoDerivs License, which permits use and distribution in any medium, provided the original work is properly cited, the use is non-commercial and no modifications or adaptations are made.

**Table S1.** Crystallographic data of **1** and **5**.

|                                                | <b>1</b>                                                                       | <b>5</b>                                                                       |
|------------------------------------------------|--------------------------------------------------------------------------------|--------------------------------------------------------------------------------|
| CCDC                                           | 1901404                                                                        | 1901405                                                                        |
| formula                                        | C <sub>30</sub> H <sub>36</sub> N <sub>4</sub> O <sub>10</sub> Zn <sub>2</sub> | C <sub>40</sub> H <sub>40</sub> N <sub>4</sub> O <sub>10</sub> Zn <sub>2</sub> |
| sum formula                                    | C <sub>30</sub> H <sub>36</sub> N <sub>4</sub> O <sub>10</sub> Zn <sub>2</sub> | C <sub>40</sub> H <sub>40</sub> N <sub>4</sub> O <sub>10</sub> Zn <sub>2</sub> |
| <i>M</i> g mol <sup>-1</sup>                   | 743.41                                                                         | 867.50                                                                         |
| crystal system                                 | triclinic                                                                      | monoclinic                                                                     |
| space group                                    | <i>P</i> -1                                                                    | <i>P</i> 2 <sub>1</sub> / <i>c</i>                                             |
| crystal description                            | colourless plate                                                               | colourless plate                                                               |
| <i>a</i> / Å                                   | 9.4692(4)                                                                      | 16.9724(5)                                                                     |
| <i>b</i> / Å                                   | 13.2391(6)                                                                     | 14.5261(5)                                                                     |
| <i>c</i> / Å                                   | 13.1893(6)                                                                     | 17.2695(6)                                                                     |
| <i>α</i> / °                                   | 96.547(4)                                                                      | 90                                                                             |
| <i>β</i> / °                                   | 93.463(3)                                                                      | 115.352(2)                                                                     |
| <i>γ</i> / °                                   | 106.449(4)                                                                     | 90                                                                             |
| <i>V</i> / Å <sup>3</sup>                      | 1567.97(13)                                                                    | 3847.6(2)                                                                      |
| <i>Z</i>                                       | 2                                                                              | 4                                                                              |
| <i>ρ</i> <sub>calcd</sub> / g cm <sup>-3</sup> | 1.575                                                                          | 1.498                                                                          |
| <i>μ</i> / mm <sup>-1</sup>                    | 1.593                                                                          | 1.311                                                                          |
| crystal size/ mm                               | 0.136×0.050×0.046                                                              | 0.120×0.106×0.075                                                              |
| <i>F</i> (000)                                 | 768                                                                            | 1792                                                                           |
| <i>T</i> / K                                   | 133(2)                                                                         | 133(2)                                                                         |
| <i>λ</i> / Å                                   | Mo-K <sub>α</sub> 0.71073                                                      | Mo-K <sub>α</sub> 0.71073                                                      |
| <i>θ</i> range/ °                              | 2.09–28.47                                                                     | 1.9–28.1                                                                       |
| Reflns. collected                              | 8917                                                                           | 22994                                                                          |
| Indep. reflns. ( <i>R</i> <sub>int</sub> )     | 7320 (0.071)                                                                   | 8714 (0.033)                                                                   |
| Parameters                                     | 415                                                                            | 505                                                                            |
| <i>R</i> 1 (all data)                          | 0.0464                                                                         | 0.0295                                                                         |
| <i>wR</i> 2                                    | 0.1134                                                                         | 0.0662                                                                         |
| Goof                                           | 0.89                                                                           | 0.94                                                                           |

**Table S2.** Selected bond lengths/ Å of **1** and **5**.

|          | Zn–N <sub>py</sub>       | Zn–N <sub>ax</sub>       | Zn–O <sub>ax</sub>       | Zn–O53                   | Zn2–O51    | Zn1–O52    | O51–C51  | O52–C51  | O53–C53  | O54–C53  |
|----------|--------------------------|--------------------------|--------------------------|--------------------------|------------|------------|----------|----------|----------|----------|
| <b>1</b> | 2.134(3)<br>2.159(3)     | 2.031(3)<br>2.021(3)     | 2.059(3)<br>2.054(3)     | 2.024(3)<br>2.035(3)     | 2.031(3)   | 1.978(3)   | 1.257(5) | 1.270(5) | 1.311(5) | 1.222(5) |
| <b>5</b> | 2.1189(11)<br>2.1662(19) | 2.0330(15)<br>2.0424(16) | 2.0435(15)<br>2.0500(16) | 2.0396(13)<br>2.0499(13) | 2.0086(16) | 1.9708(15) | 1.250(2) | 1.263(2) | 1.307(2) | 1.221(2) |

**Table S3.** Hydrogen bonds and angles of **1** and **5**.

|          |                             | D–H/Å | H···A/Å | D···A/Å  | D–H···A/° |
|----------|-----------------------------|-------|---------|----------|-----------|
| <b>1</b> | C14–H14···O54 <sup>a</sup>  | 0.95  | 2.34    | 3.140(5) | 142       |
| <b>5</b> | C13–H13···O33 <sup>b</sup>  | 0.95  | 2.43    | 3.287(3) | 150       |
|          | C14–H14···O54 <sup>b</sup>  | 0.95  | 2.43    | 3.309(3) | 154       |
|          | C27–H27A···O32 <sup>c</sup> | 0.99  | 2.57    | 3.205(3) | 122       |
|          | C33–H33···O54 <sup>d</sup>  | 0.95  | 2.46    | 3.175(3) | 132       |
|          | C44–H44···O51 <sup>e</sup>  | 0.95  | 2.50    | 3.393(3) | 157       |
|          | C52–H52B···O12 <sup>f</sup> | 0.98  | 2.52    | 3.454(3) | 160       |

a: -1+x, y, z; b: x, 1/2-y, 1/2+z; c: 1+x, y, 1+z; d: 2-x, -y, 1-z; e: 1-x, -y, 1-z; f: 2-x, -y, 2-z.

**Table S4.** Summary of the C–H···π interactions of **1** and **5**.

|          |          | C <sub>g</sub>                       | H···C <sub>g</sub> /Å | X–H···C <sub>g</sub> /° | X···C <sub>g</sub> /Å |
|----------|----------|--------------------------------------|-----------------------|-------------------------|-----------------------|
| <b>1</b> | C6–H6B   | Zn2–N31–C35–C36–N32 <sup>a</sup>     | 2.769                 | 147                     | 3.626(4)              |
|          | C36–H36A | Zn1–N11–C15–C16–N12 <sup>b</sup>     | 2.95                  | 135                     | 3.718(4)              |
|          | C42–H42B | Zn2–O31–C39–C38–C37–N32 <sup>c</sup> | 2.68                  | 138                     | 3.479(5)              |
| <b>5</b> | C32–H32  | C20–C21–C22–C23–C24–C25 <sup>d</sup> | 2.67                  | 142                     | 3.467(2)              |
|          | C16–H16B | Zn1–O11–C19–C18–C17–N12 <sup>e</sup> | 2.48                  | 153                     | 3.388(2)              |
|          | C44–H44  | Zn2–O31–C39–C38–C37–N32 <sup>f</sup> | 2.85                  | 126                     | 3.493(2)              |

a: -1+x, y, z; b: 1+x, y, z; c: 2-x, -y, 1-z; d: x, y, z; e: 2-x, -y, 2-z; f: 1-x, -y, 1-z.

**Table S5.** Selected distances and angles of the  $\pi$ - $\pi$  and M- $\pi$  interactions of **1** and **5**.  $C_g(I)$  is the centroid of the ring number I,  $\alpha$  is the dihedral angle between the rings,  $\beta$  is the angle between the vector  $C_g(I) \rightarrow C_g(J)$  and the normal to ring I,  $\gamma$  is the angle between the vector  $C_g(I) \rightarrow C_g(J)$  and the normal to ring J.

|          | $C_g(I)$                | $C_g(J)$                             | $C_g-C_g/\text{\AA}$ | $\alpha/^\circ$ | $\beta/^\circ$ | $\gamma/^\circ$ |
|----------|-------------------------|--------------------------------------|----------------------|-----------------|----------------|-----------------|
| <b>1</b> | N31-C31-C32-C33-C34-C35 | N31-C31-C32-C33-C34-C35 <sup>a</sup> | 3.721(2)             | 0.00(19)        | 22.1           | 22.1            |
| <b>5</b> | N31-C31-C32-C33-C34-C35 | N31-C31-C32-C33-C34-C35 <sup>b</sup> | 3.4814(12)           | 0.00(10)        | 18.0           | 18.0            |

a: 2-x, -y, 2-z; b: 2-x, -y, 1-z.

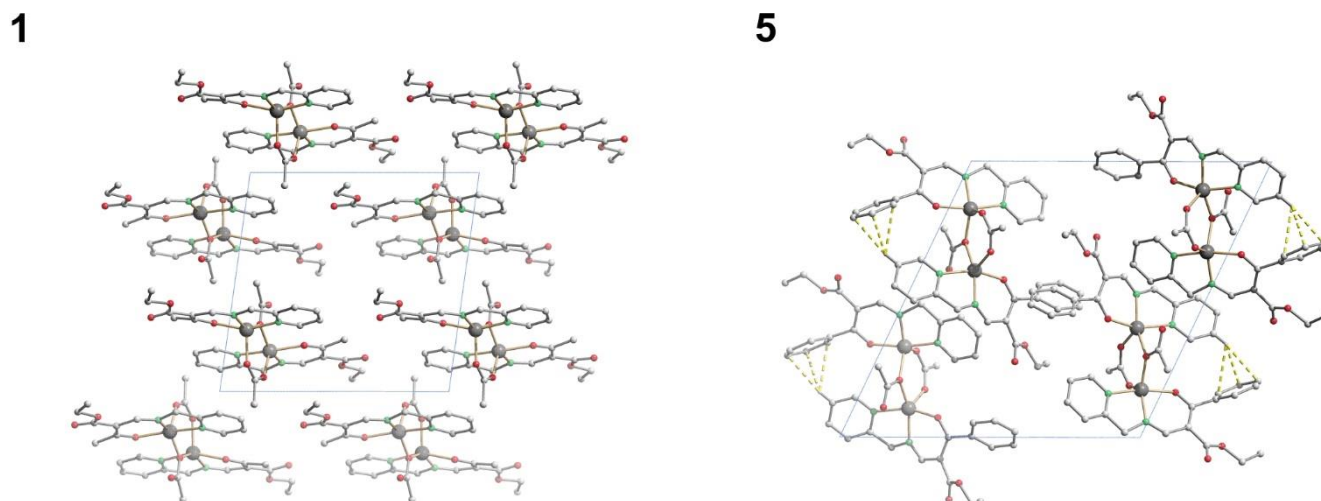

**Figure S1.** Molecular packing of **1** (left, along [100]) and **5** (right, along [010]). Discussed C-H $\cdots$  $\pi$  interactions of **5** are drawn as yellow, dashed lines. Hydrogen atoms not involved in intermolecular interactions were omitted for clarity.

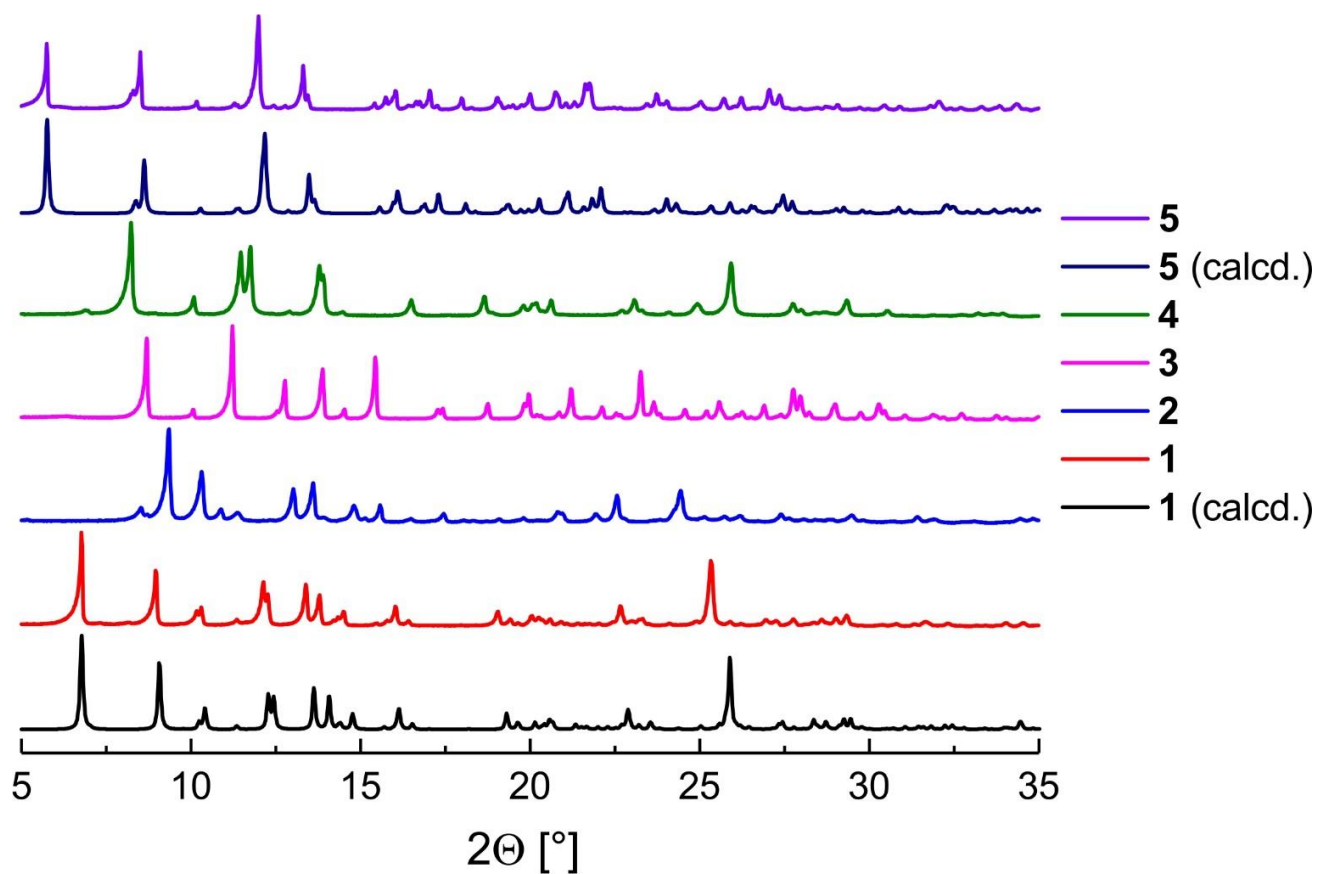

**Figure S2.** Powder X-ray diffraction patterns of 1–5, measured and calculated. The calculated patterns were obtained at 133 K, the measured ones at room temperature.

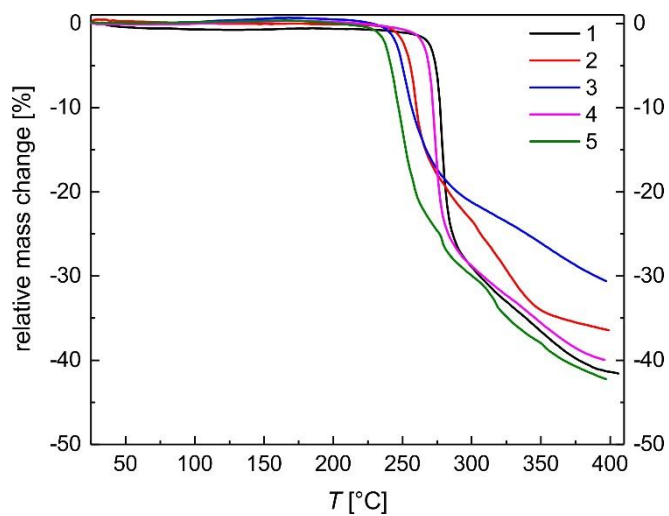

**Figure S4.** TGA measurements of complexes 1–5.

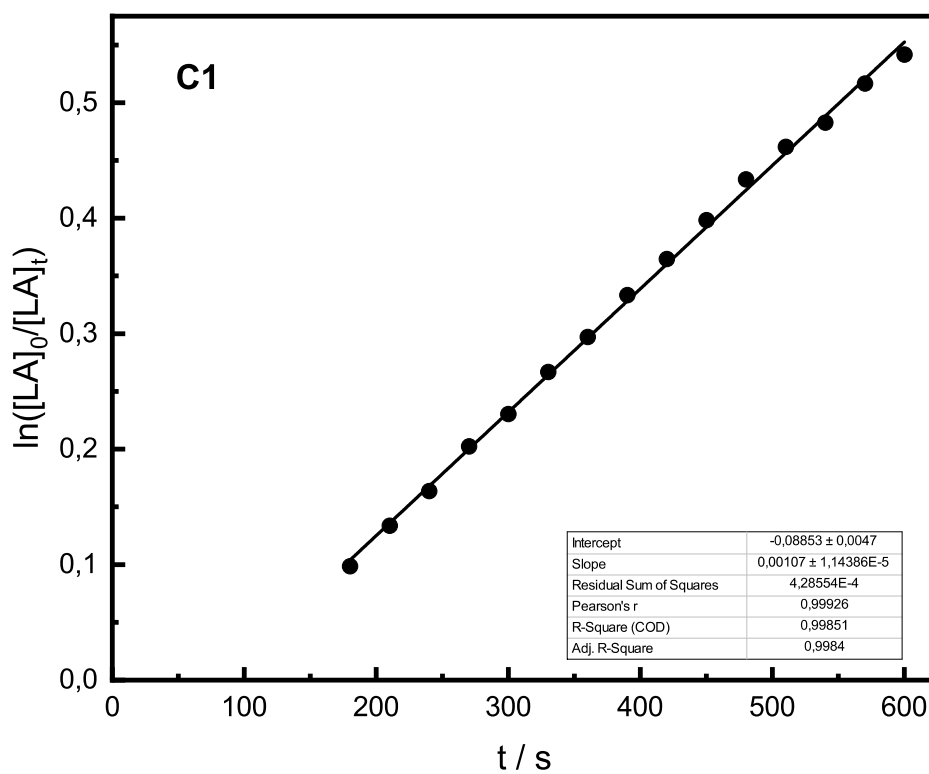

**Figure S5.** Semi-logarithmic plot of the polymerization of non-purified *rac*-LA with 1  $[M]/[I] = 500:1$ , 150 °C, 260 rpm, conversion determined by *in situ* Raman spectroscopy.

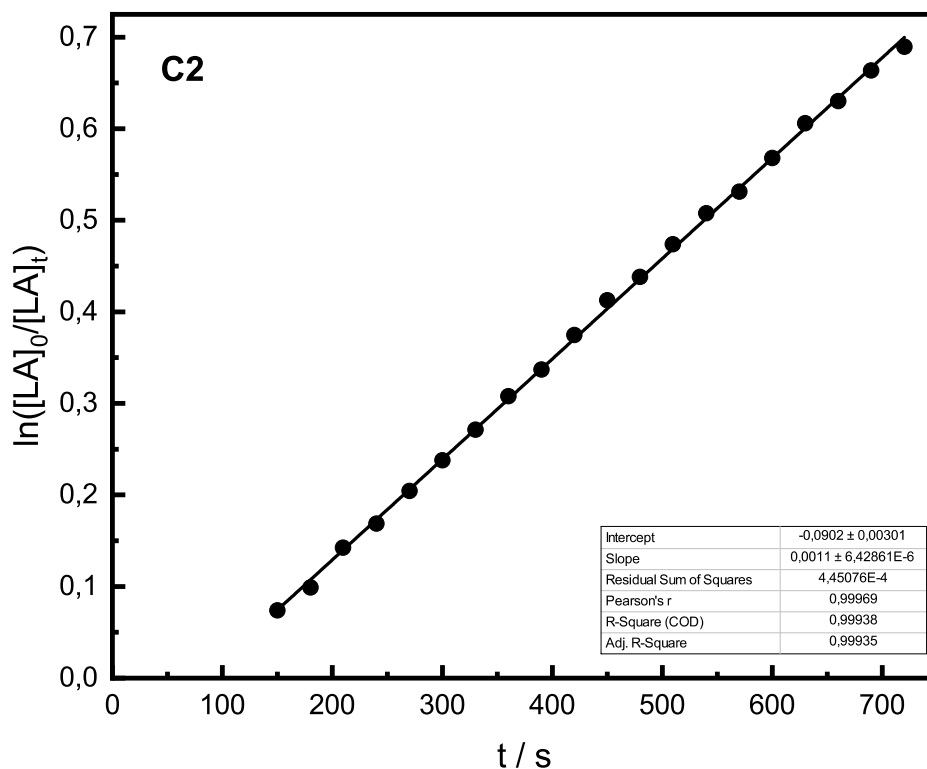

**Figure S6.** Semi-logarithmic plot of the polymerization of non-purified *rac*-LA with **2** [M]/[I] = 500:1, 150 °C, 260 rpm, conversion determined by *in situ* Raman spectroscopy.

**Table S7.** Polymerization data for *rac*-LA with catalyst **2**.

| [M]/[I] | $k_{app}$ (s <sup>-1</sup> ) <sup>[b]</sup> | time (min) | conv. (%) <sup>[c]</sup> | $M_{n,theo}$ (g mol <sup>-1</sup> ) | $M_n$ (g mol <sup>-1</sup> ) <sup>[d]</sup> | <i>PD</i> |
|---------|---------------------------------------------|------------|--------------------------|-------------------------------------|---------------------------------------------|-----------|
| 500     | 1.14 × 10 <sup>-3</sup>                     | 25         | 62                       | 45 000                              | 65 000                                      | 1.5       |
| 625     | 8.60 × 10 <sup>-4</sup>                     | 30         | 78                       | 70 000                              | 54 000                                      | 1.8       |
| 1000    | 4.22 × 10 <sup>-4</sup>                     | 27         | 65                       | 94 000                              | 81 000                                      | 1.4       |
| 1500    | 2.23 × 10 <sup>-4</sup>                     | 61         | 57                       | 123 000                             | 43 000                                      | 1.8       |
| 2000    | 1.28 × 10 <sup>-4</sup>                     | 112        | 56                       | 161 000                             | 21 000                                      | 2.2       |

[a] Conditions: 150 °C, solvent free, non-purified technical grade *rac*-LA. [b] Determined from the slope of the plots of ln([LA]<sub>0</sub>/[LA]<sub>t</sub>) versus time. [c] As determined by <sup>1</sup>H NMR spectroscopy. [d] Determined by GPC (in THF),  $M_{n,theo}$ : 72 000 g mol<sup>-1</sup> for 100% conversion.

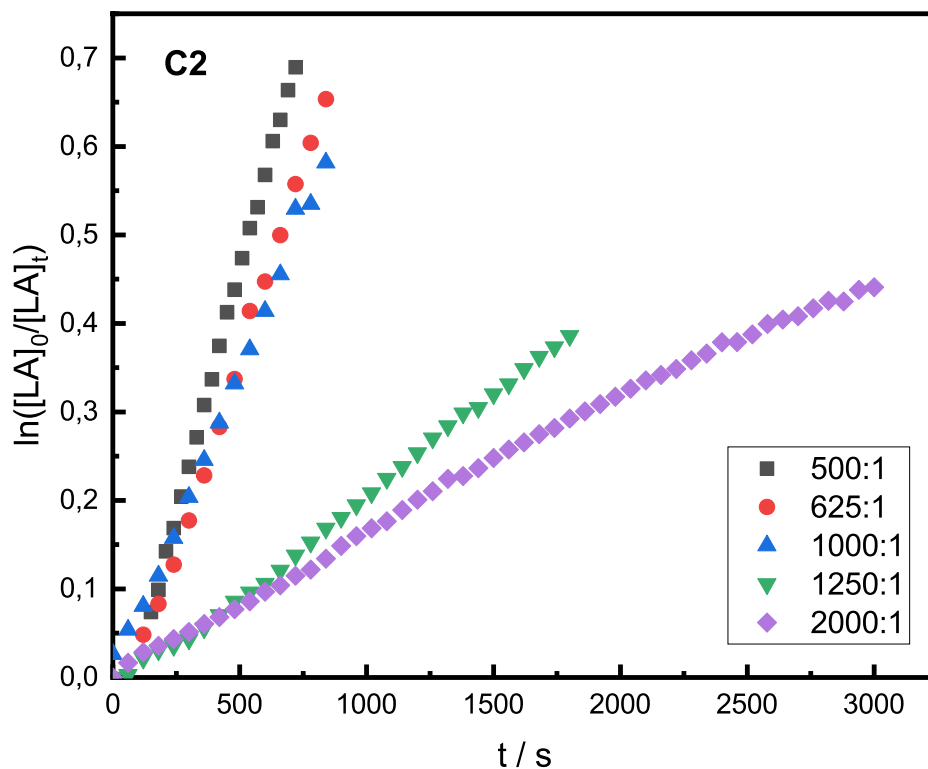

**Figure S7.** Semi-logarithmic plot of the polymerization of non-purified *rac*-LA with **2**  $[M]/[I] = 500:1$  ( $k_{app} =$ ),  $[M]/[I] = 625:1$  ( $k_{app} =$ ),  $[M]/[I] = 1000:1$  ( $k_{app} =$ ),  $[M]/[I] = 1250:1$  ( $k_{app} =$ ),  $[M]/[I] = 2000:1$  ( $k_{app} =$ ), 150 °C, 260 rpm, conversion determined by *in situ* Raman spectroscopy.

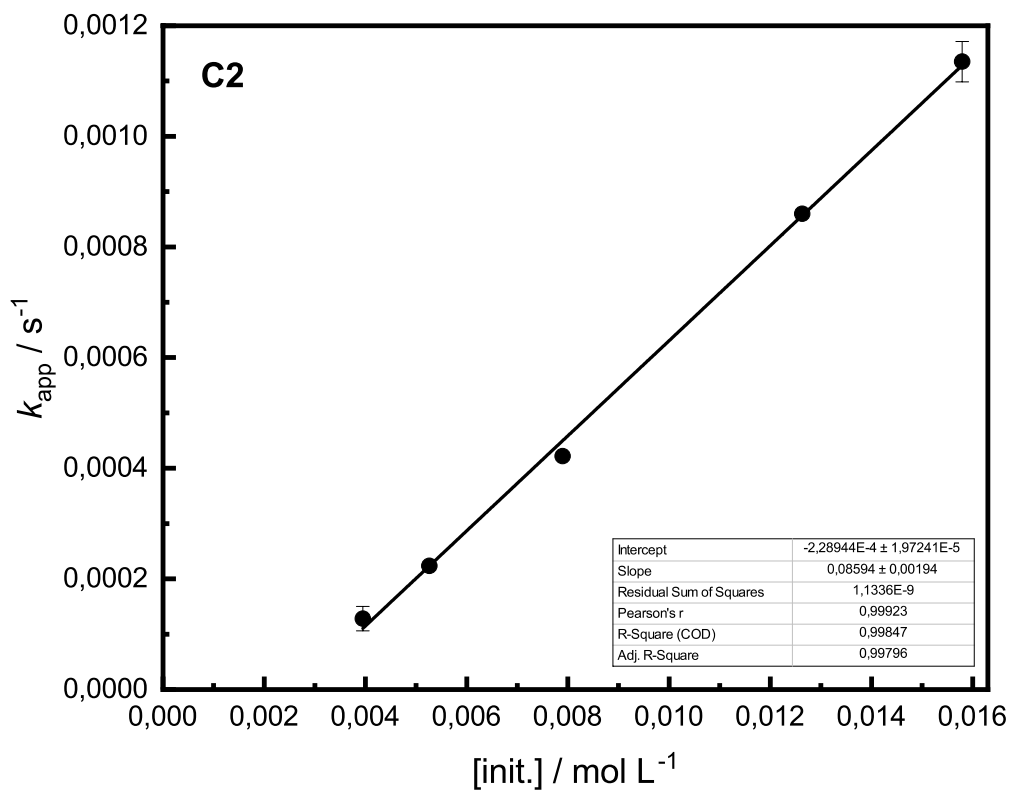

**Figure S8.** Plot of  $k_{app}$  versus  $[init.]$  for **2**. Conditions: *rac*-LA, 150 °C, 260 rpm, non-purified;  $[M]/[I] = 500:1$ , 625:1, 1000:1, 1500:1, 2000:1.

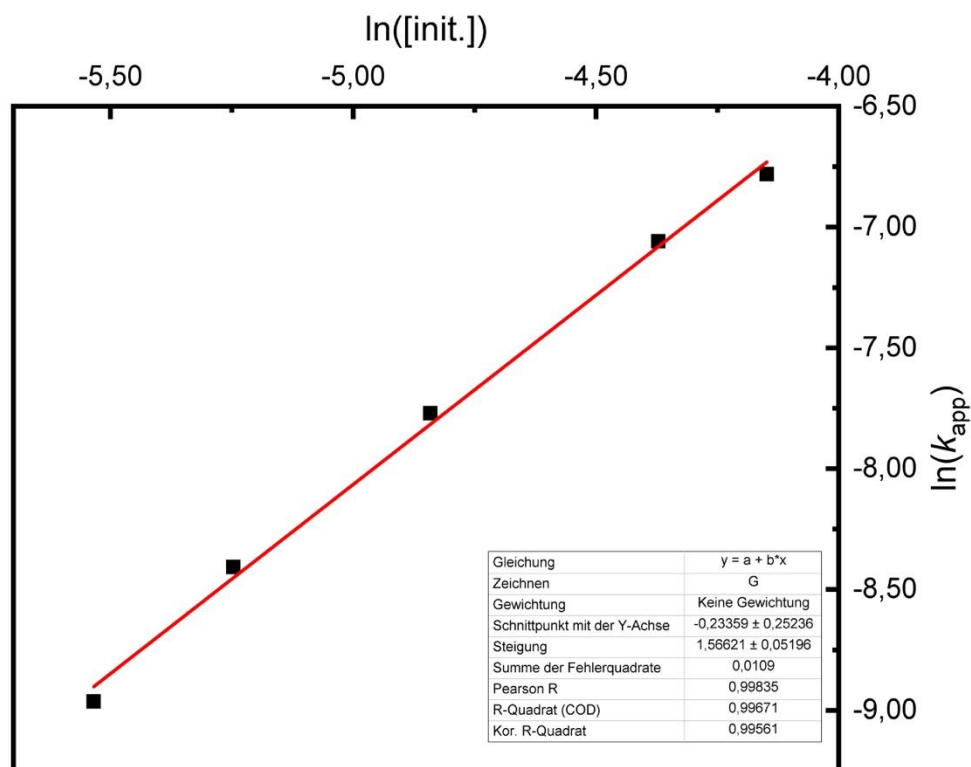

**Figure S9.** Logarithmic plot of  $\ln(k_{app})$  versus  $\ln([init.])$  for the polymerization of non-purified *rac*-LA with 4  $[M]/[I] = 500:1$ , 150 °C, 260 rpm.

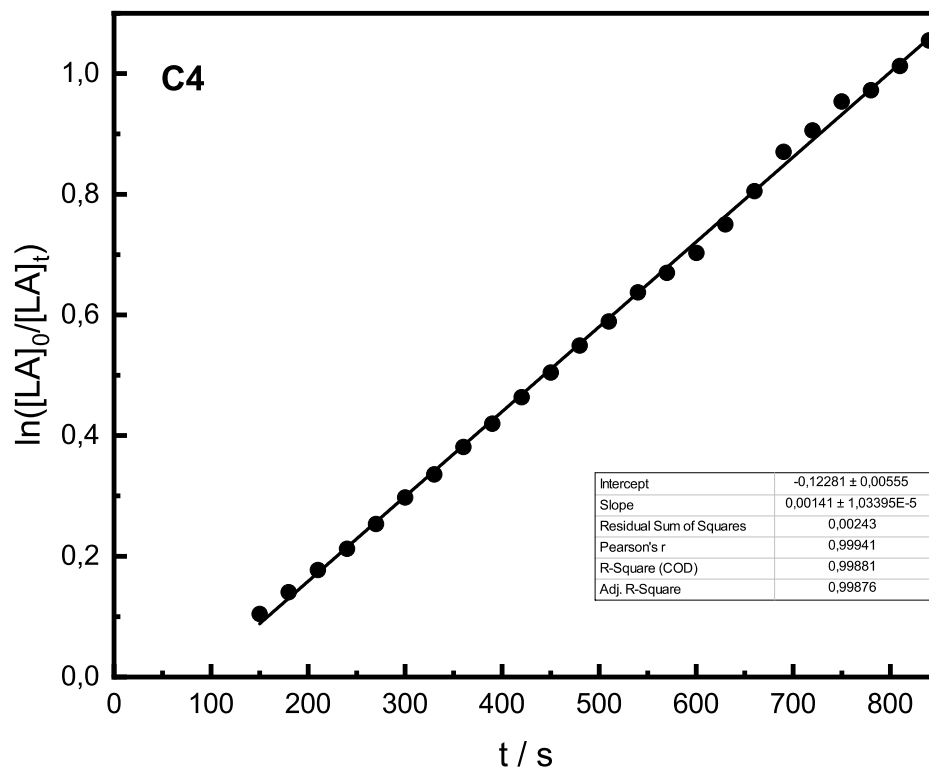

**Figure S10.** Semi-logarithmic plot of the polymerization of non-purified *rac*-LA with 4  $[M]/[I] = 500:1$ , 150 °C, 260 rpm, conversion determined by *in situ* Raman spectroscopy.

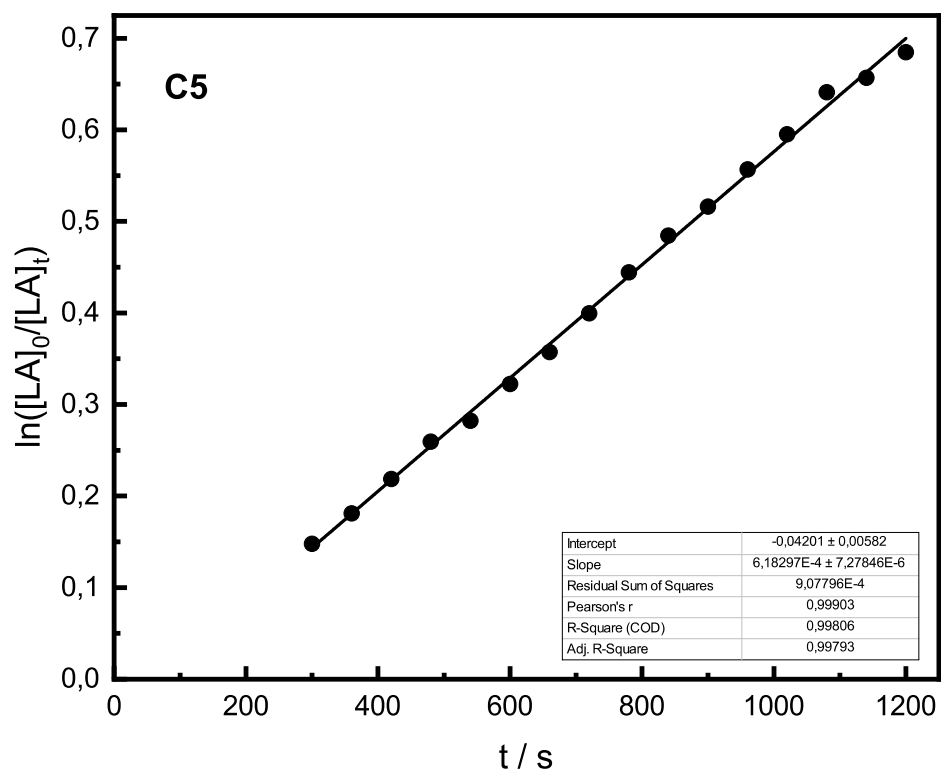

**Figure S11.** Semi-logarithmic plot of the polymerization of non-purified *rac*-LA with 5 [M]/[I] = 500:1, 150 °C, 260 rpm, conversion determined by *in situ* Raman spectroscopy.

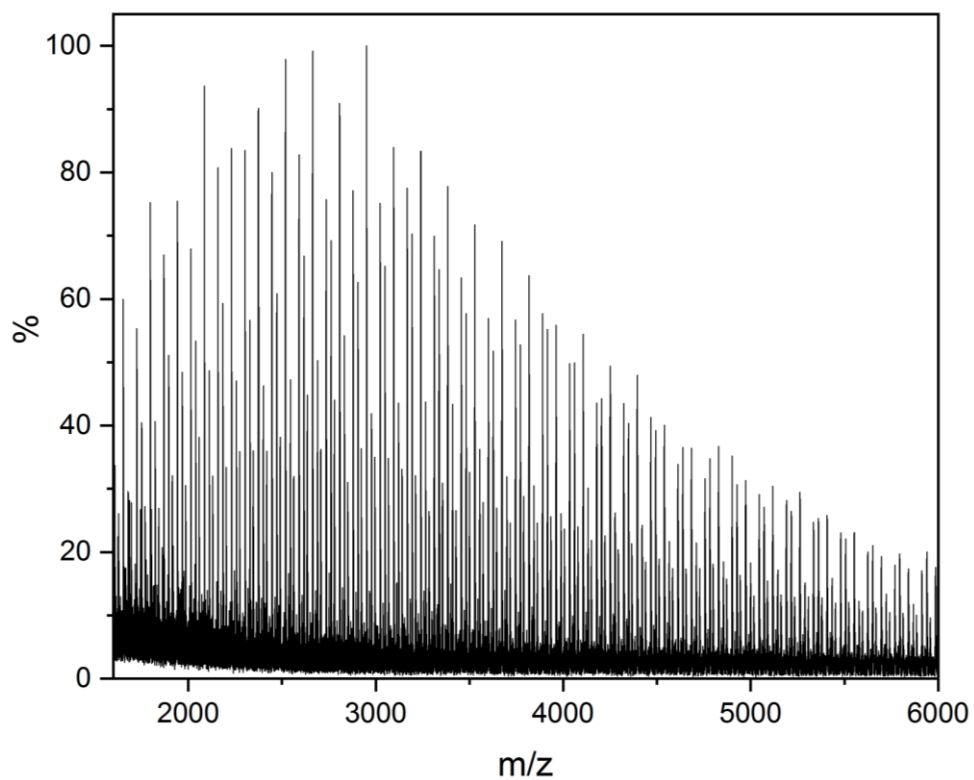

**Figure S12.** Stack of MALDI-ToF spectra obtained for a polymerisation with 4 [M]/[I] = 70:1, 150 °C, 260 rpm, *rac*-LA.



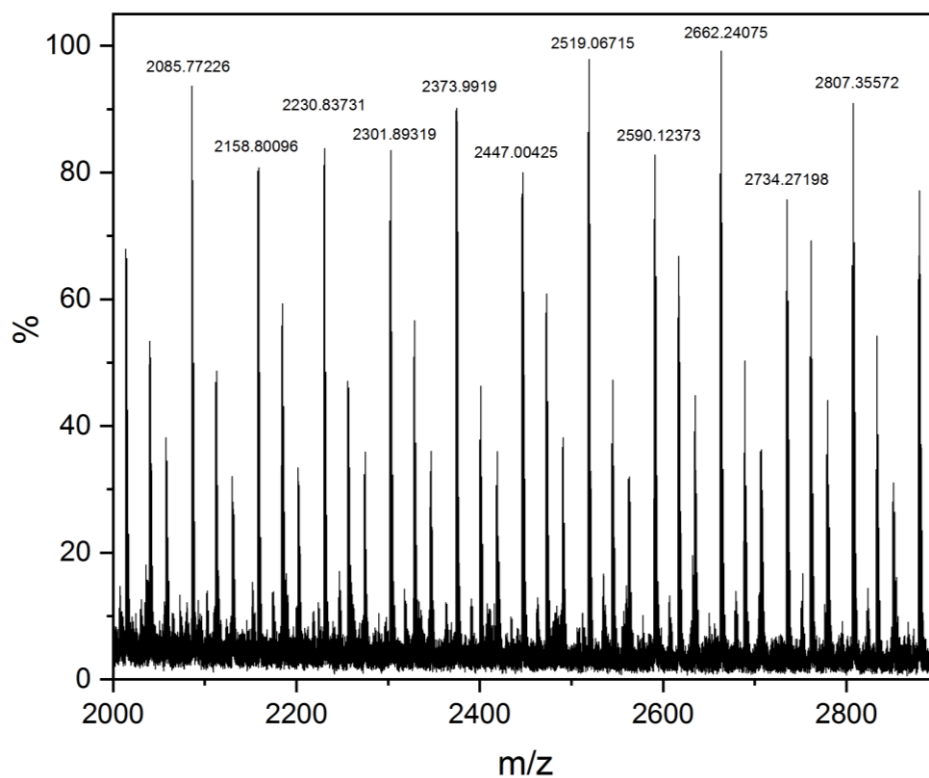

**Figure S13.** Stack of MALDI-ToF spectra obtained for a polymerisation with **4** [M]/[I] = 70:1, 150 °C, 260 rpm, *rac*-LA. For m/z 2807.35572:

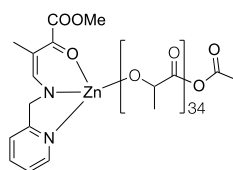

**Table S8.** Possible end-groups for the obtained polymer initiated by **4** [M]/[I] = 70:1, 150 °C, 260 rpm, *rac*-LA.

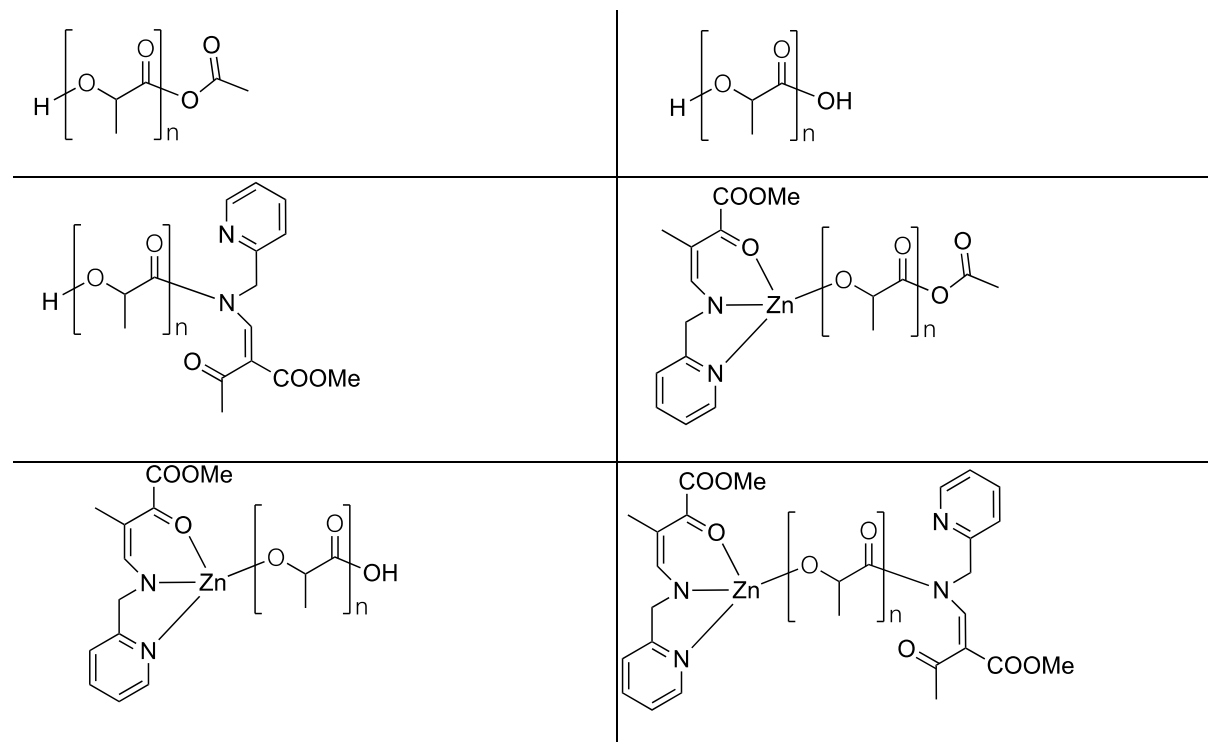

Results of the MALDI-ToF analysis for all series of the spectrum:

Ligand-Zn-PLA: 26.77%  
Ligand-PLA: 10.59%  
Acetate-PLA: 22.94%  
OH: 10.53%  
H: 17.29%

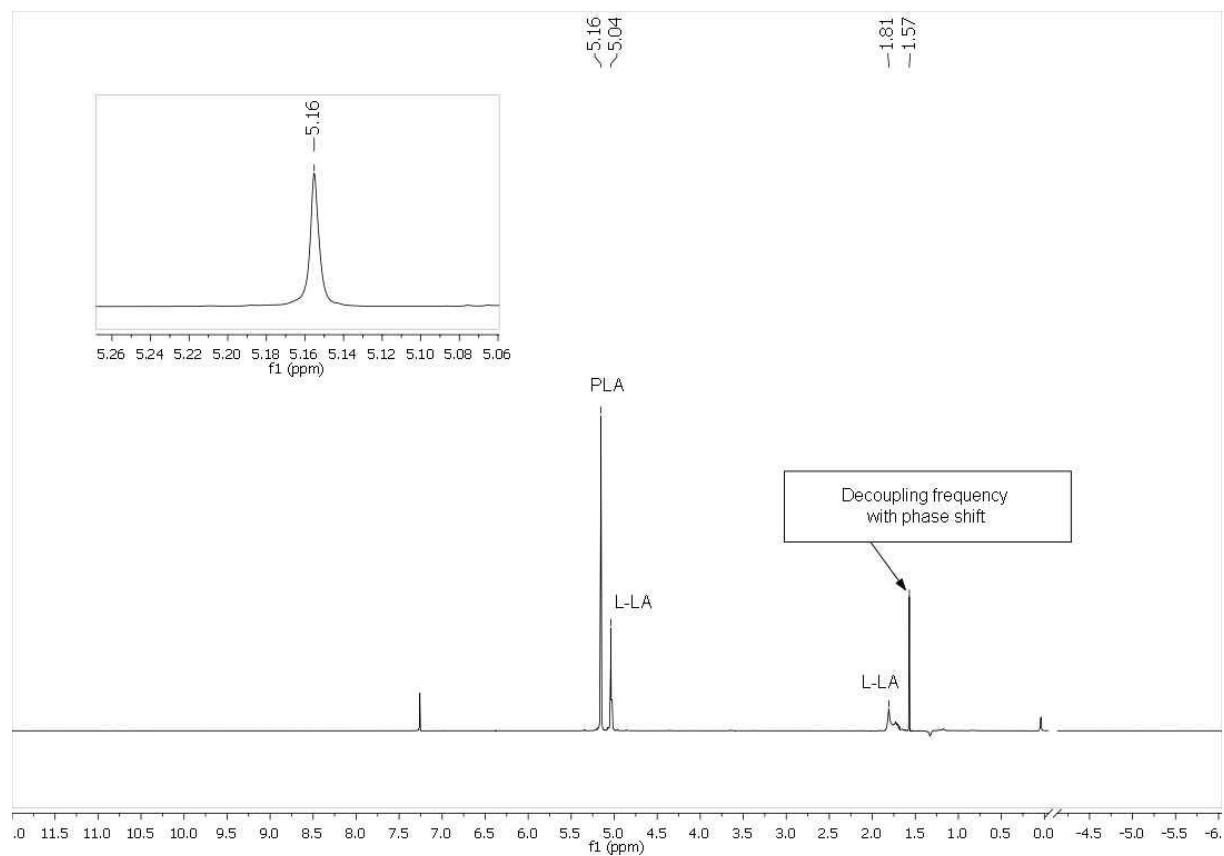

**Figure S14.** Homonuclear decoupled <sup>1</sup>H NMR spectrum (CDCl<sub>3</sub>, 400 MHz) of PLA prepared by polymerization of L-lactide with **2** at 150 °C.
